# Supplementary material for: Glutamine synthetase mRNA releases sRNA from its 3′UTR to regulate carbon/nitrogen metabolic balance in Enterobacteriaceae
Source: PubMed Central journal article supplement (PMC9731577; doi:10.7554/elife.82411), 2022-11-28

### GlnZ

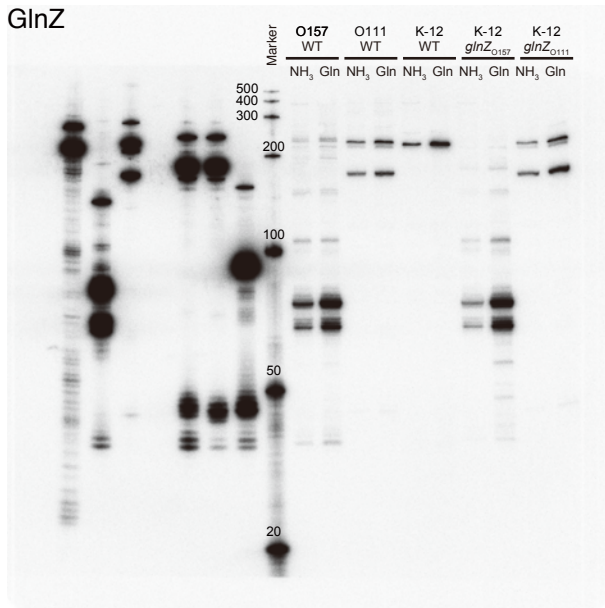

### GlnA

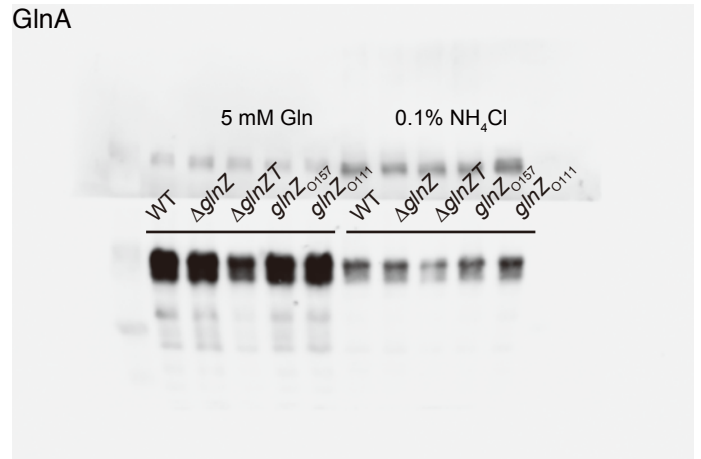

### SroC

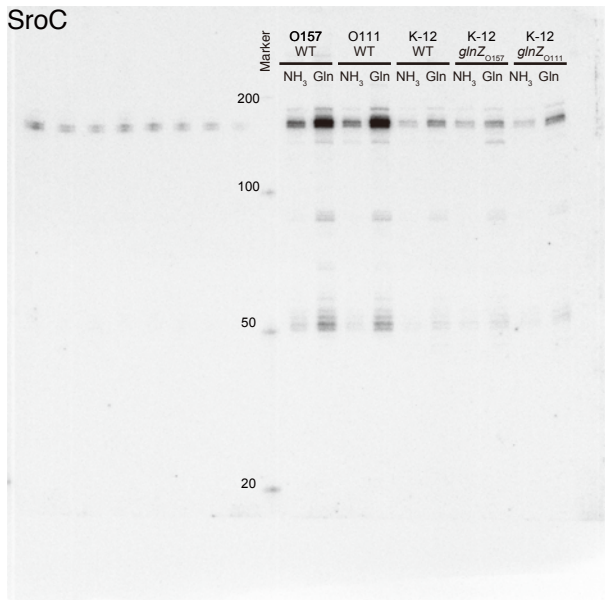

### NtrC

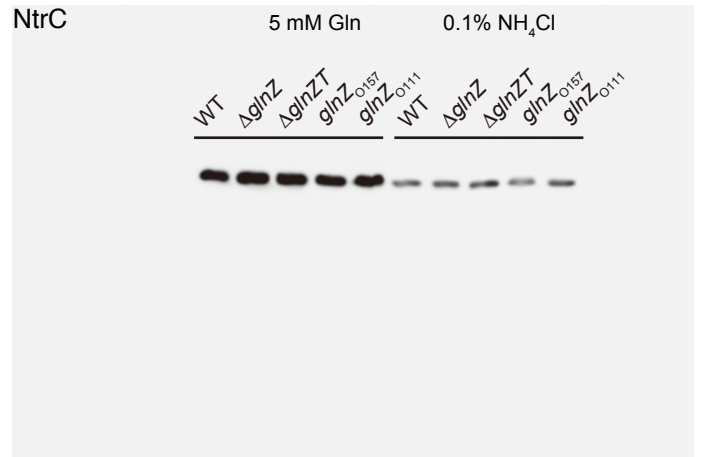

### 5S

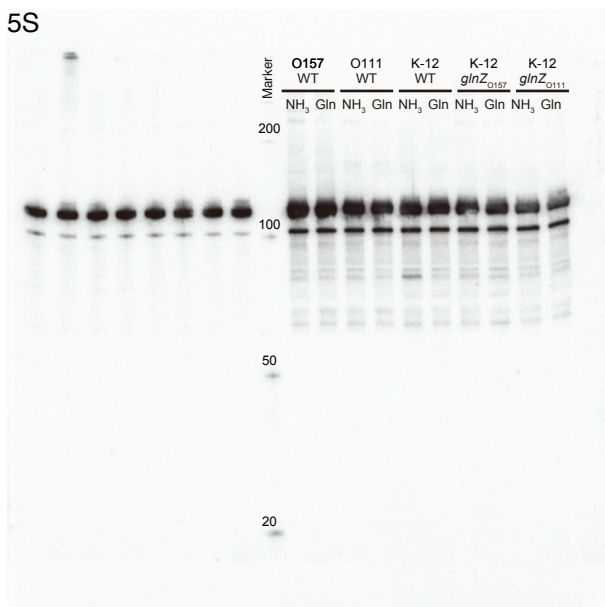

### GroEL

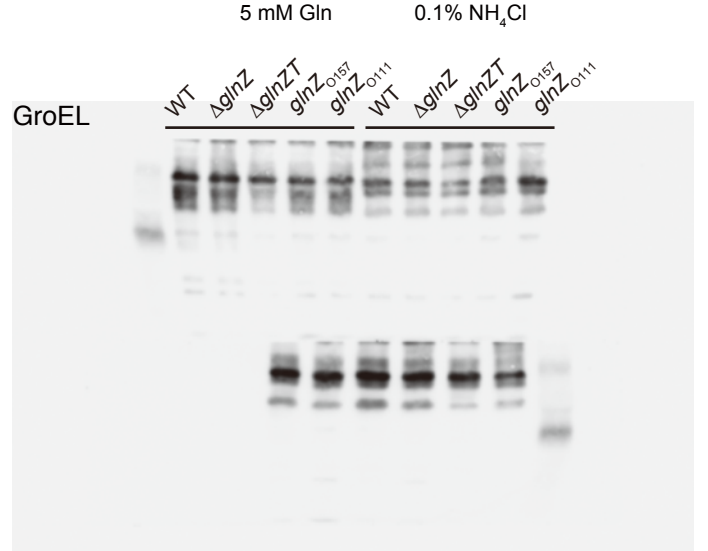

Supplement: elife-82411-fig2-data1.pdf [file elife-82411-fig2-data1.pdf]
