# Supplementary material for: Glutamine synthetase mRNA releases sRNA from its 3′UTR to regulate carbon/nitrogen metabolic balance in Enterobacteriaceae
Source: PubMed Central journal article supplement (PMC9731577; doi:10.7554/elife.82411), 2022-11-28

GlnZ MMO-0416

Figure 5S1B

Figure 5C

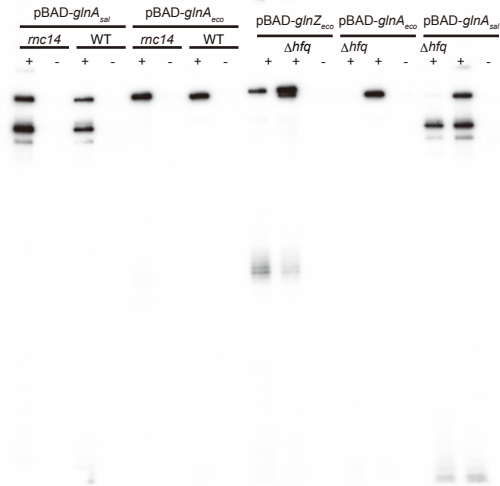

5S rRNA MMO-1056

Figure 5S1B

Figure 5C

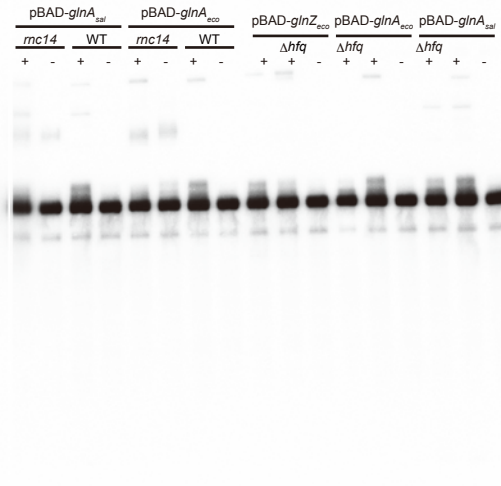

GlnZ MMO-0419

Figure 5S1B

Figure 5C

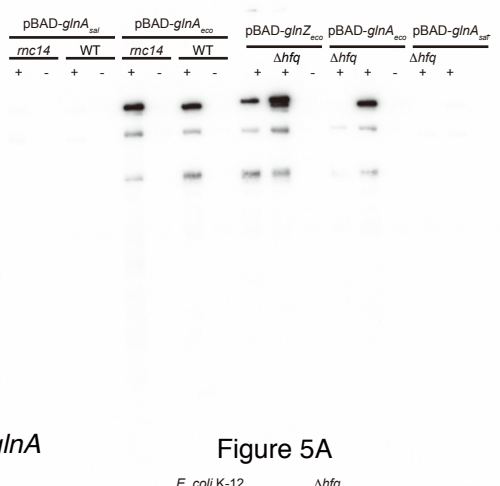

Figure 5A

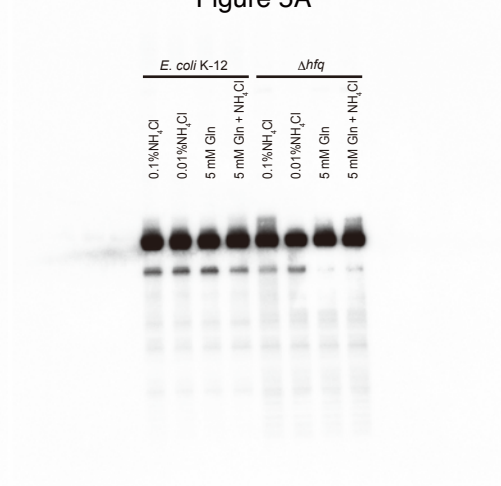

*glnA*

Figure 5A

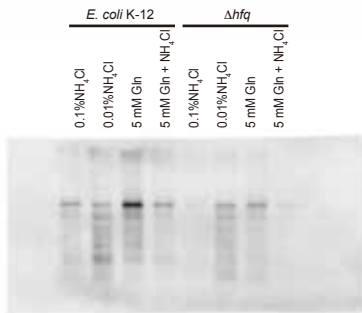

Figure 5A

GlnZ MMO-0419

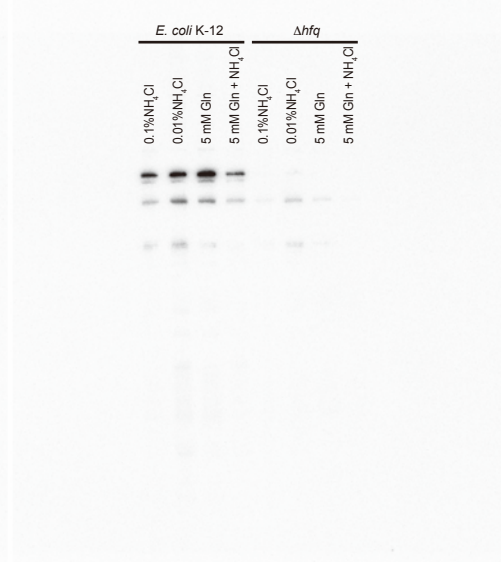

Supplement: elife-82411-fig5-data3.pdf [file elife-82411-fig5-data3.pdf]
