# Supplementary material for: Glutamine synthetase mRNA releases sRNA from its 3′UTR to regulate carbon/nitrogen metabolic balance in Enterobacteriaceae
Source: PubMed Central journal article supplement (PMC9731577; doi:10.7554/elife.82411), 2022-11-28

Figure 5B

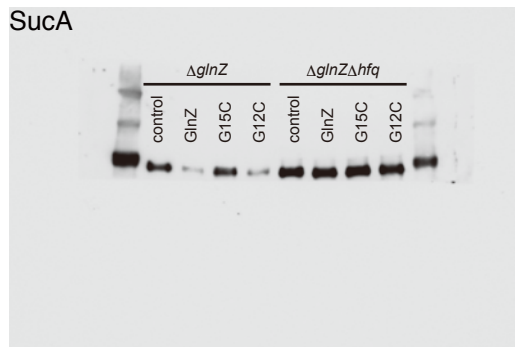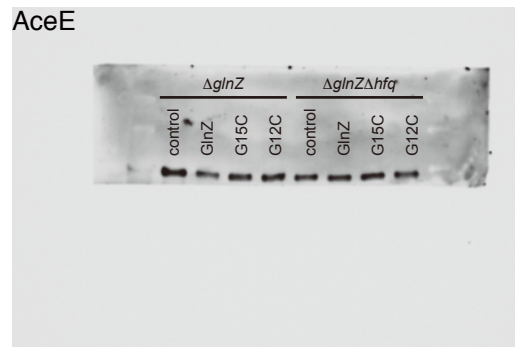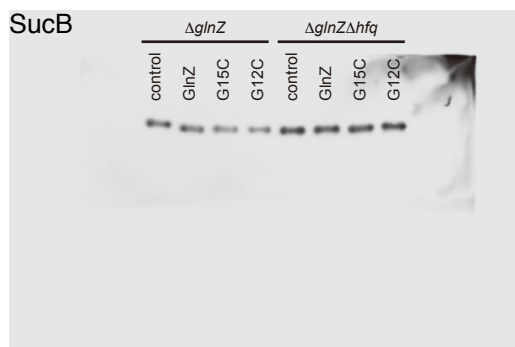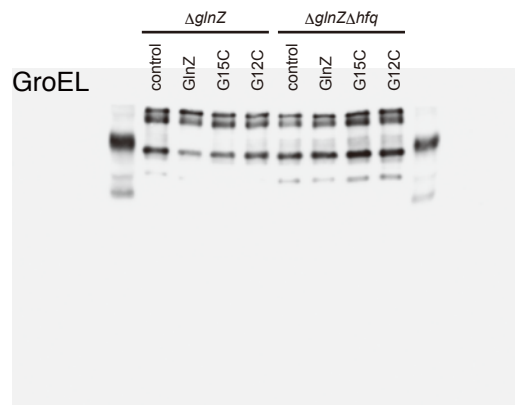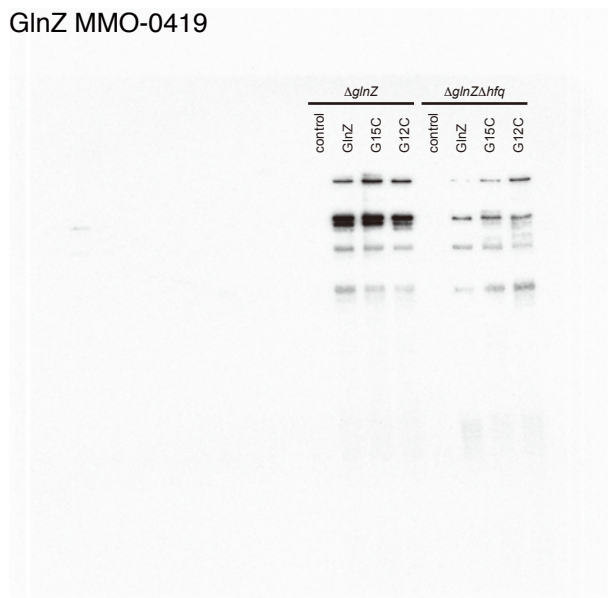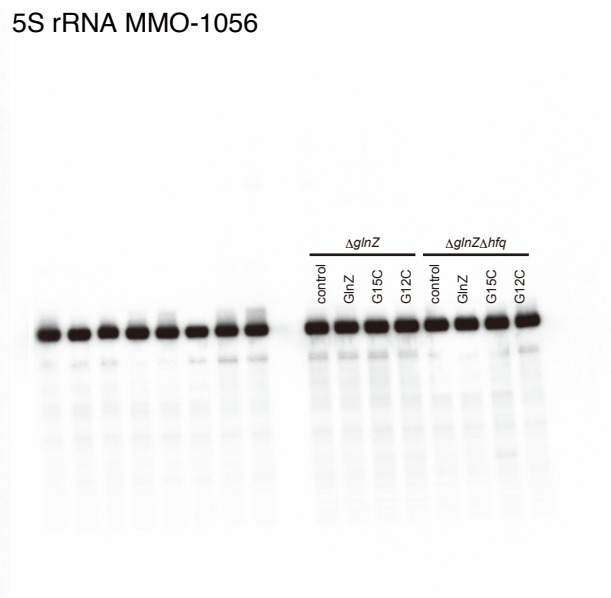

Supplement: elife-82411-fig5-data5.pdf [file elife-82411-fig5-data5.pdf]
