# Supplementary material for: Glutamine synthetase mRNA releases sRNA from its 3′UTR to regulate carbon/nitrogen metabolic balance in Enterobacteriaceae
Source: eLife journal article supplement (doi:10.7554/elife.82411), 2022-11-28

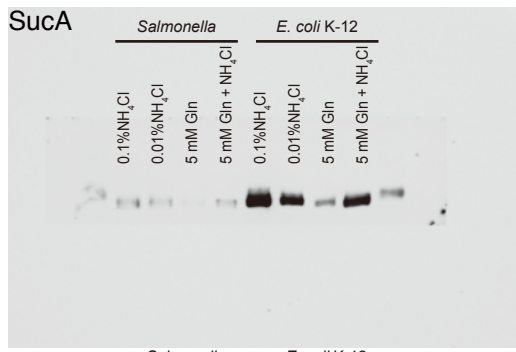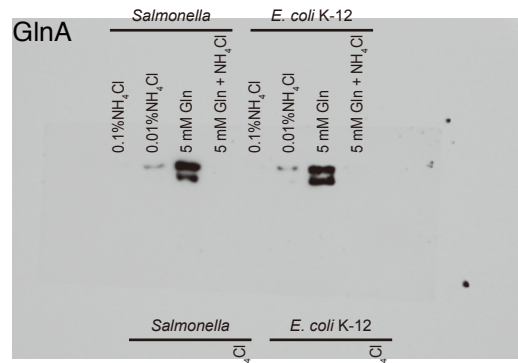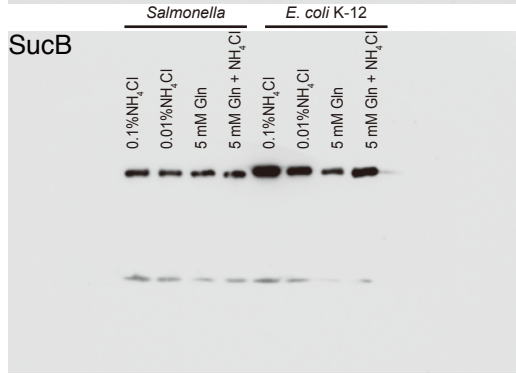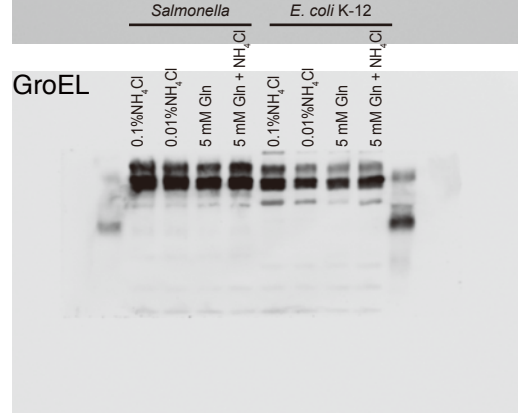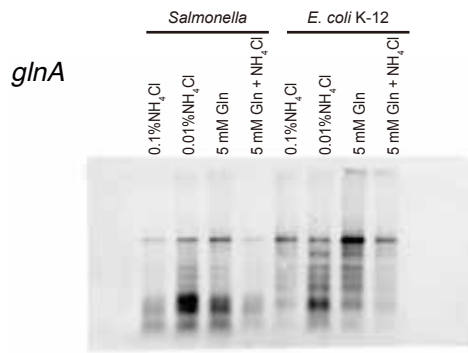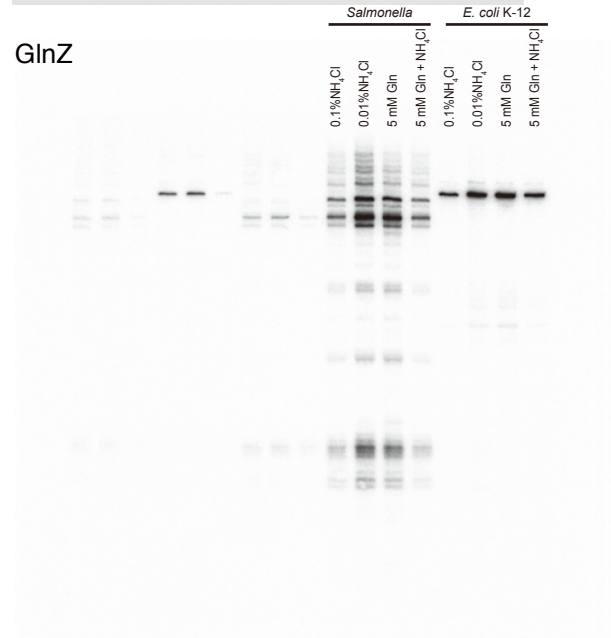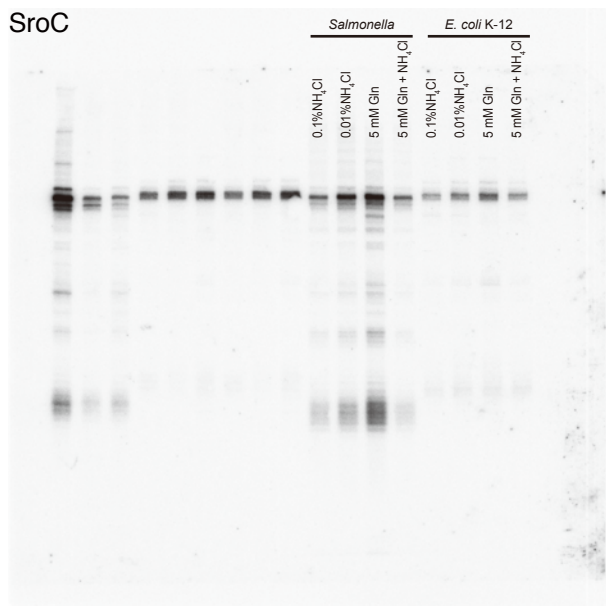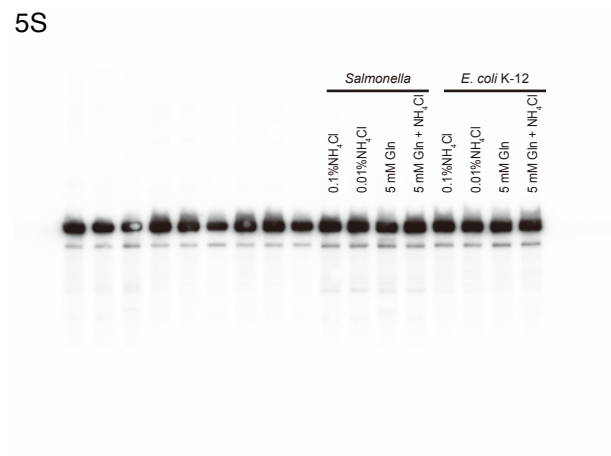

Supplement: fig1-data1 [file elife-82411-fig1-data1-v3.pdf]
